# Supplementary material for: Characterization of Clinical Escherichia coli Strains Producing a Novel Shiga Toxin 2 Subtype in Sweden and Denmark
Source: MDPI journal article supplement (doi:10.3390/microorganisms9112374), 2021-11-17
Supplement: s1 [file s1]

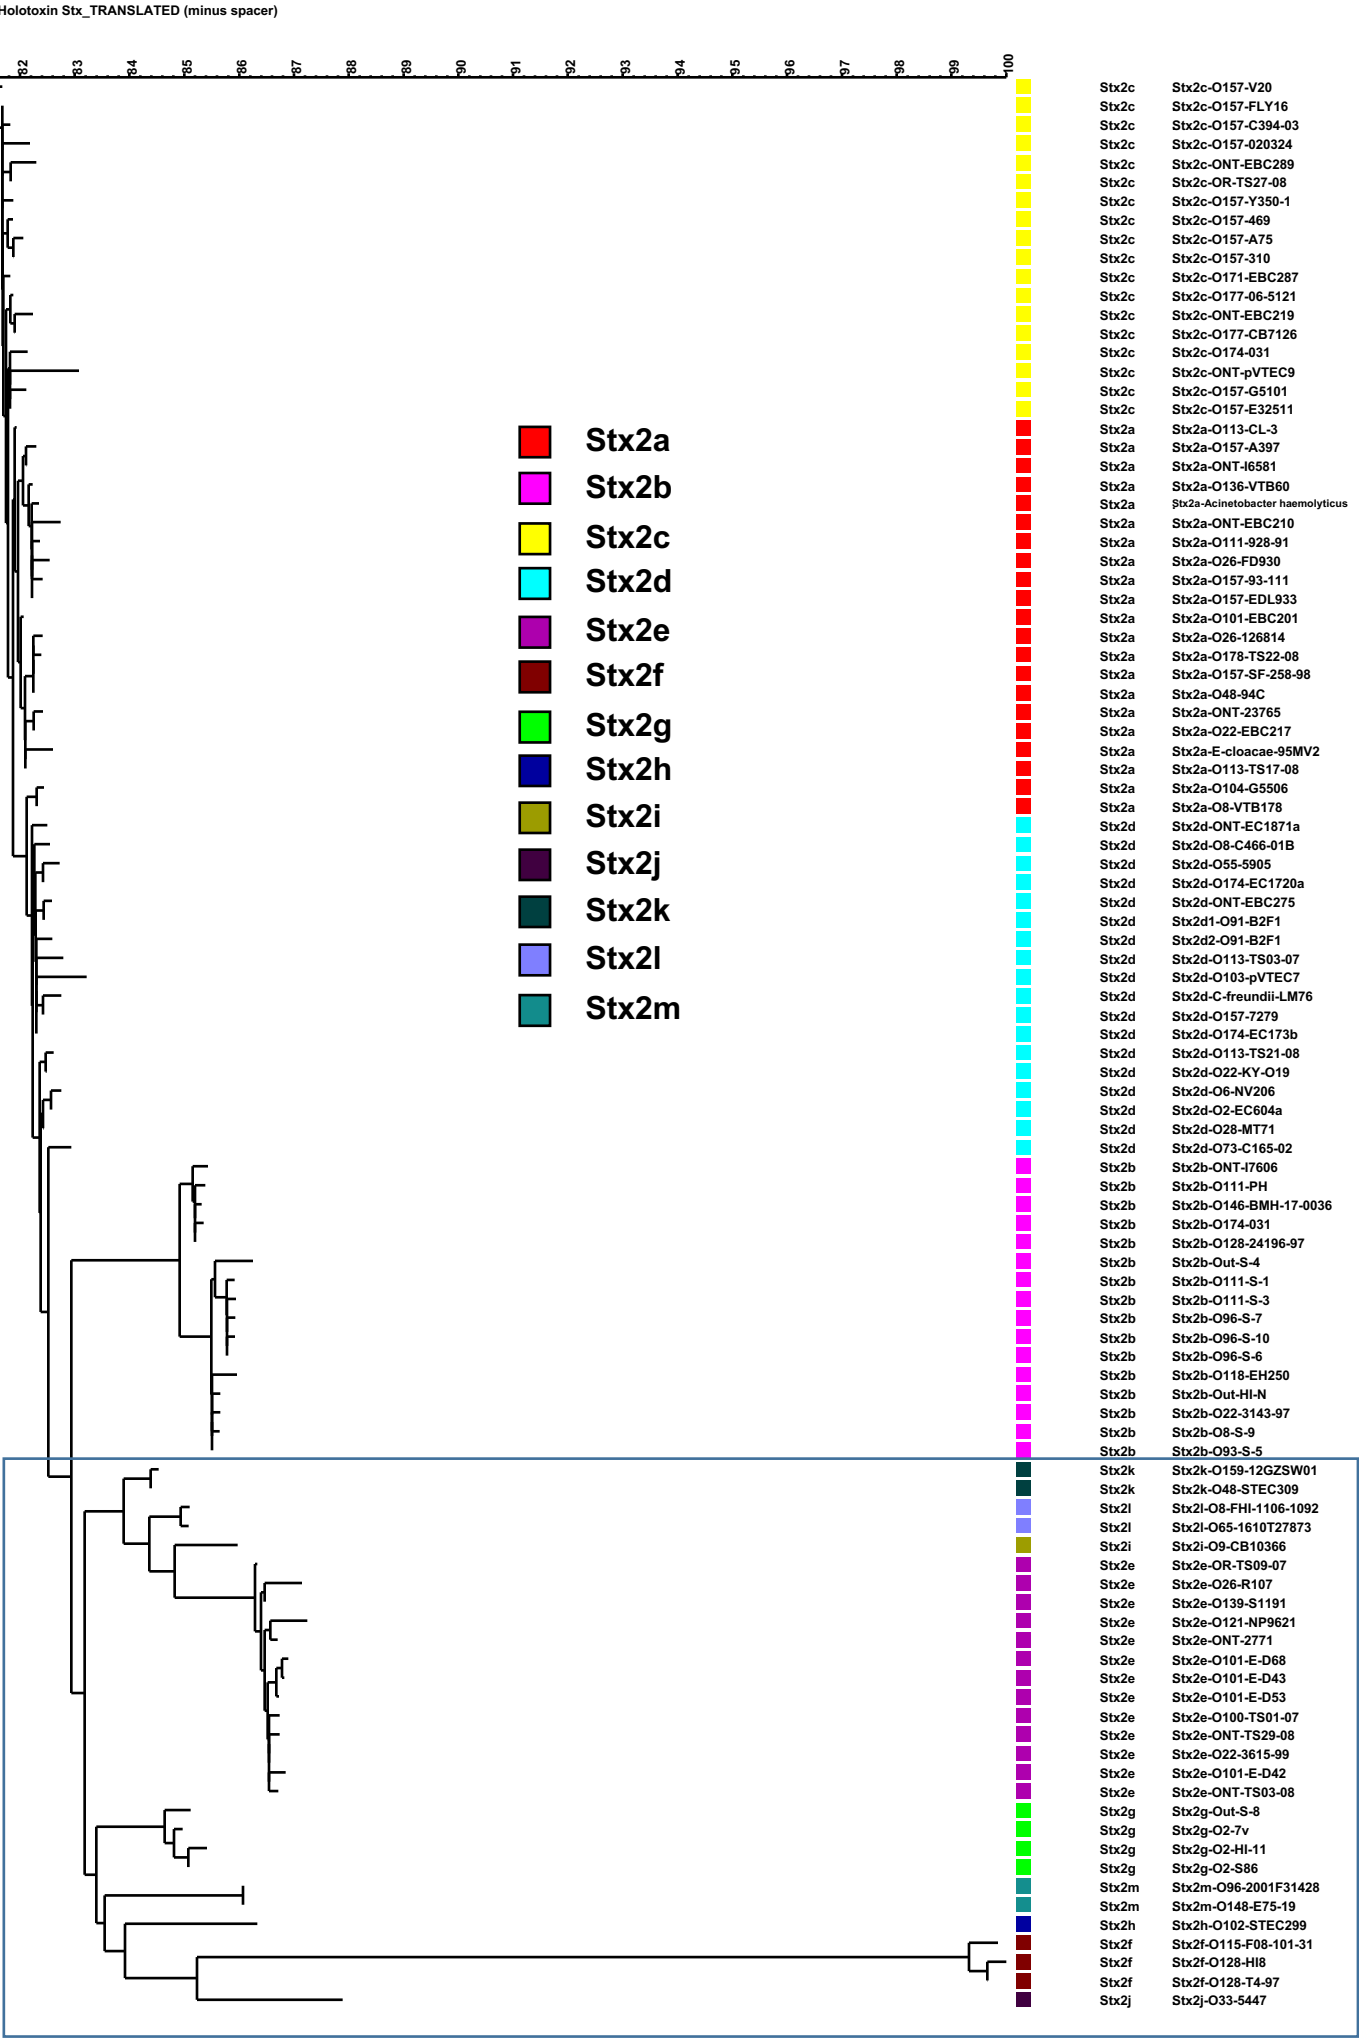

**Figure S1.** Five main clusters of Stx2a-Stx2g and representative sequences of six newly designated Stx2h-Stx2m subtypes: Neighbour-Joining cluster analysis of 102 unique sequences as described in the text and the proposed new designations.
